# Supplementary material
Source: PubMed Central journal article supplement (PMC10714284)
Supplement: jama-e2324945-s004.pdf [file jama-e2324945-s004.pdf]

\*Indicates required information. Only first name, last name, and suffix will appear in PubMed.

| <b>*Group Name(s): SURMOUNT-4 Investigators</b> |                   |                              |                  |                                                                 |                                          |                                                         |                                                                                            |
|-------------------------------------------------|-------------------|------------------------------|------------------|-----------------------------------------------------------------|------------------------------------------|---------------------------------------------------------|--------------------------------------------------------------------------------------------|
| <b>*First Name and Middle Initial(s)</b>        | <b>*Last Name</b> | <b>*Suffix (eg, Jr, III)</b> | Academic Degrees | Institution                                                     | Location (city, state/province, country) | Role or Contribution, eg, chair, principal investigator | Group (if more than 1 Group listed in the byline) and/or Subgroup (eg, Steering Committee) |
| José O                                          | Fretes            |                              | MD               | Mautalen Salud e Investigación                                  | CABA, Buenos Aires, Argentina            | Principal Investigator                                  |                                                                                            |
| Maria J                                         | Coronel           |                              | MD               | Centro Medico Dra. Laura Maffei- Investigacion Clinica Aplicada | CABA, Buenos Aires, Argentina            | Principal Investigator                                  |                                                                                            |
| Lucas L                                         | Gutnisky          |                              | MD               | Stat Research S.A.                                              | CABA, Buenos Aires, Argentina            | Principal Investigator                                  |                                                                                            |
| Gustavo D                                       | Frechtel          |                              | MD               | Asociación de Beneficencia Hospital Sirio Libanés               | CABA, Buenos Aires, Argentina            | Principal Investigator                                  |                                                                                            |
| Elizabeth                                       | Gelersztejn       |                              | MD               | CEDIC Cento de Investigación Clínica                            | CABA, Buenos Aires, Argentina            | Principal Investigator                                  |                                                                                            |
| Diego                                           | Aizenberg         |                              | MD               | Centro Médico Viamonte                                          | CABA, Buenos Aires, Argentina            | Principal Investigator                                  |                                                                                            |
| Natacha                                         | Maldonado         |                              | MD               | Instituto Médico Catamarca IMEC                                 | Rosario, Santa Fe, Argentina             | Principal Investigator                                  |                                                                                            |
| Márcio                                          | Pereira           |                              | MD               | ISPEM - Instituto São José dos Campos em Pesquisas Médicas      | São José dos Campos, São Paulo, Brazil   | Principal Investigator                                  |                                                                                            |
| Queulla G                                       | Santos            |                              | MD               | CEDOES                                                          | Vitória, Espírito Santo, Brazil          | Principal Investigator                                  |                                                                                            |
| Camila                                          | Calil Salim       |                              | MD               | CEDOES                                                          | Vitória, Espírito Santo, Brazil          | Principal Investigator                                  |                                                                                            |
| Luis H                                          | Canani            |                              | MD               | Núcleo de Pesquisa Clínica do Rio Grande do Sul                 | Porto Alegre, Rio Grande do Sul, Brazil  | Principal Investigator                                  |                                                                                            |
| Bruno                                           | Halpern           |                              | MD, PhD          | BR Trials - Ensaio Clinicos e Consultoria                       | São Paulo, São Paulo, Brazil             | Principal Investigator                                  |                                                                                            |
| Luis AT                                         | Russo             |                              | MD, PhD          | IBPClin - Instituto Brasil de Pesquisa Clínica                  | Rio de Janeiro, Rio de Janeiro, Brazil   | Principal Investigator                                  |                                                                                            |
| Joselita                                        | Bodart            |                              | MD               | IBPClin - Instituto Brasil de Pesquisa Clínica                  | Rio de Janeiro, Rio de Janeiro, Brazil   | Principal Investigator                                  |                                                                                            |

## Supplemental Online Content: Nonauthor Collaborators

\*Indicates required information. Only first name, last name, and suffix will appear in PubMed.

| *First Name and Middle Initial(s) | *Last Name   | *Suffix (eg, Jr, III) | Academic Degrees | Institution                                              | Location (city, state/province, country) | Role or Contribution, eg, chair, principal investigator | Group (if more than 1 Group listed in the byline) and/or Subgroup (eg, Steering Committee) |
|-----------------------------------|--------------|-----------------------|------------------|----------------------------------------------------------|------------------------------------------|---------------------------------------------------------|--------------------------------------------------------------------------------------------|
| Danilo V                          | Neto         |                       | PhD              | Centro de Pesquisa Sao Lucas                             | Campinas, São Paulo, Brazil              | Principal Investigator                                  |                                                                                            |
| Gustavo                           | Augusto      |                       | MD               | CPQuali Pesquisa Clínica                                 | São Paulo, São Paulo, Brazil             | Principal Investigator                                  |                                                                                            |
| Silmara                           | Leite        |                       | MD               | Cline Research Center                                    | Curitiba, Paraná, Brazil                 | Principal Investigator                                  |                                                                                            |
| Yi-Ching                          | Yang         |                       | MD               | National Cheng Kung University Hospital                  | Tainan, Taiwan                           | Principal Investigator                                  |                                                                                            |
| Wen-Yuan                          | Lin          |                       | MD, PhD          | China Medical University Hospital                        | Taichung, Taiwan                         | Principal Investigator                                  |                                                                                            |
| Chien-Ning                        | Huang        |                       | MD, PhD          | Chung Shan Medical University Hospital                   | Taichung, Taiwan                         | Principal Investigator                                  |                                                                                            |
| Kuo-Chin                          | Huang        |                       | MD, PhD          | National Taiwan University Hospital                      | Taipei, Taiwan                           | Principal Investigator                                  |                                                                                            |
| David                             | Fitz-Patrick |                       | MD               | East-West Medical Research Institute                     | Honolulu, HI, United States              | Principal Investigator                                  |                                                                                            |
| Cindy HT                          | Pau          |                       | MD               | East-West Medical Research Institute                     | Honolulu, HI, United States              | Principal Investigator                                  |                                                                                            |
| Phillip D                         | Toth         |                       | MD               | Midwest Institute For Clinical Research                  | Indianapolis, IN, United States          | Principal Investigator                                  |                                                                                            |
| George H                          | Freeman      |                       | DO               | Health Research of Hampton Roads, Inc.                   | Newport News, VA, United States          | Principal Investigator                                  |                                                                                            |
| Donald F                          | Gardner      |                       | MD               | Biopharma Informatic, LLC                                | Houston, TX, United States               | Principal Investigator                                  |                                                                                            |
| Alan G                            | Wynne        |                       | MD               | Cotton O'Neil Clinical Research Center                   | Topeka, KS, United States                | Principal Investigator                                  |                                                                                            |
| Juan                              | Loy          |                       | MD               | South Florida Clinical Research Institute                | Margate, FL, United States               | Principal Investigator                                  |                                                                                            |
| Deborah B                         | Horn         |                       | MD               | The University of Texas Health Science Center at Houston | Houston, TX, United States               | Principal Investigator                                  |                                                                                            |
| Purvi K                           | Mehra        |                       | MD               | Artemis Institute for Clinical Research                  | San Diego, CA, United States             | Principal Investigator                                  |                                                                                            |

## Supplemental Online Content: Nonauthor Collaborators

\*Indicates required information. Only first name, last name, and suffix will appear in PubMed.

| *First Name and Middle Initial(s) | *Last Name         | *Suffix (eg, Jr, III) | Academic Degrees | Institution                                                        | Location (city, state/province, country) | Role or Contribution, eg, chair, principal investigator | Group (if more than 1 Group listed in the byline) and/or Subgroup (eg, Steering Committee) |
|-----------------------------------|--------------------|-----------------------|------------------|--------------------------------------------------------------------|------------------------------------------|---------------------------------------------------------|--------------------------------------------------------------------------------------------|
| Stacey                            | Layle              |                       | MD               | Artemis Institute for Clinical Research                            | San Diego, CA, United States             | Principal Investigator                                  |                                                                                            |
| James H                           | Bergthold          |                       | MD               | Summit Research Network, Inc.                                      | Portland, OR, United States              | Principal Investigator                                  |                                                                                            |
| Jose                              | de Souza           |                       | MD               | Logan Health Research                                              | Kalispell, MT, United States             | Principal Investigator                                  |                                                                                            |
| Venkatesh K                       | Nadar              |                       | MD               | Capital Area Research, LLC                                         | Camp Hill, PA, United States             | Principal Investigator                                  |                                                                                            |
| Gustavo R                         | Albizu Angulo      |                       | MD               | Wellness clinical Research, LLC                                    | Vega Baja, PR, United States             | Principal Investigator                                  |                                                                                            |
| Kenneth R                         | Cohen              |                       | MD               | New West Physicians Clinical Research                              | Golden, CO, United States                | Principal Investigator                                  |                                                                                            |
| Timothy R                         | Smith              |                       | MD               | StudyMetrix Research                                               | St. Peters, MO, United States            | Principal Investigator                                  |                                                                                            |
| Louis J                           | Aronne             |                       | MD               | Weill Cornell Medicine, Comprehensive Weight Control Center        | New York, NY, United States              | Principal Investigator                                  |                                                                                            |
| Michael                           | Vaughn             |                       | MD               | Cahaba Research                                                    | Birmingham, AL, United States            | Principal Investigator                                  |                                                                                            |
| Altagracia A                      | Alcantara-Gonzalez |                       | MD               | Centro de Endocrinologia Alcantara Gonzalez                        | Bayamon, PR, United States               | Principal Investigator                                  |                                                                                            |
| Seth B                            | Forman             |                       | MD               | ForCare Clinical Research                                          | Tampa, FL, United States                 | Principal Investigator                                  |                                                                                            |
| John M                            | Agaiby             |                       | MD               | Clinical Investigation Specialists, Inc.                           | Gurnee, IL, United States                | Principal Investigator                                  |                                                                                            |
| Steven A                          | Geller             |                       | MD               | Centennial Medical Group                                           | Elkridge, MD, United States              | Principal Investigator                                  |                                                                                            |
| Neil J                            | Fraser             |                       | MD               | Arcturus Healthcare, PLC, Troy Internal Medicine Research Division | Troy, MI, United States                  | Principal Investigator                                  |                                                                                            |
| Robert A                          | Jenders            |                       | MD               | Velocity Clinical Research, Panorama City                          | Panorama City, CA, United States         | Principal Investigator                                  |                                                                                            |

## Supplemental Online Content: Nonauthor Collaborators

\*Indicates required information. Only first name, last name, and suffix will appear in PubMed.

| *First Name and Middle Initial(s) | *Last Name      | *Suffix (eg, Jr, III) | Academic Degrees | Institution                            | Location (city, state/province, country) | Role or Contribution, eg, chair, principal investigator | Group (if more than 1 Group listed in the byline) and/or Subgroup (eg, Steering Committee) |
|-----------------------------------|-----------------|-----------------------|------------------|----------------------------------------|------------------------------------------|---------------------------------------------------------|--------------------------------------------------------------------------------------------|
| Kim M                             | Barbel-Johnson  |                       | DO               | Care Partners Clinical Research, LLC   | Jacksonville, FL, United States          | Principal Investigator                                  |                                                                                            |
| Ronald K                          | Mayfield        |                       | MD               | Tribe Clinical Research, LLC           | Greenville, SC, United States            | Principal Investigator                                  |                                                                                            |
| Carl D                            | Vance           |                       | MD               | Rocky Mountain Clinical Research       | Idaho Falls, ID, United States           | Principal Investigator                                  |                                                                                            |
| Kevin T                           | Prier           |                       | MD               | Rocky Mountain Clinical Research       | Idaho Falls, ID, United States           | Principal Investigator                                  |                                                                                            |
| Alexander V                       | Murray          |                       | MD               | PharmQuest Life Sciences, LLC          | Greensboro, NC, United States            | Principal Investigator                                  |                                                                                            |
| Michael J                         | Lillestol       |                       | MD               | Lillestol Research LLC                 | Fargo, ND, United States                 | Principal Investigator                                  |                                                                                            |
| Douglas S                         | Denham          |                       | MD               | Clinical Trials of Texas, Inc.         | San Antonio, TX, United States           | Principal Investigator                                  |                                                                                            |
| Jean Y                            | Park            |                       | MD               | MedStar Health Research Institute      | Hyattsville, MD, United States           | Principal Investigator                                  |                                                                                            |
| Eric J                            | Klein           |                       | MD               | Capital Clinical Research Center       | Olympia, WA, United States               | Principal Investigator                                  |                                                                                            |
| Harold E                          | Bays            |                       | MD               | L-MARC Research Center                 | Louisville, KY, United States            | Principal Investigator                                  |                                                                                            |
| Athena                            | Philis-Tsimikas |                       | MD               | Scripps Memorial Hospital La Jolla     | La Jolla, CA, United States              | Principal Investigator                                  |                                                                                            |
| Peter E                           | Bressler        |                       | MD               | North Texas Endocrine Center           | Dallas, TX, United States                | Principal Investigator                                  |                                                                                            |
| John CH                           | Reed            | III                   | MD               | Endocrine Research Solutions, Inc.     | Roswell, GA, United States               | Principal Investigator                                  |                                                                                            |
| Shamaila                          | Aslam           |                       | MD               | Northwest Houston Heart Center         | Tomball, TX, United States               | Principal Investigator                                  |                                                                                            |
| Julio                             | Rosenstock      |                       | MD               | Velocity Clinical Research, Dallas     | Dallas, TX, United States                | Principal Investigator                                  |                                                                                            |
| Juan P                            | Frias           |                       | MD               | Velocity Clinical Research, Westlake   | Los Angeles, CA, United States           | Principal Investigator                                  |                                                                                            |
| Leslie J                          | Klaff           |                       | MD               | Rainier Clinical Research Center, Inc. | Renton, WA, United States                | Principal Investigator                                  |                                                                                            |

## Supplemental Online Content: Nonauthor Collaborators

\*Indicates required information. Only first name, last name, and suffix will appear in PubMed.

| *First Name and Middle Initial(s) | *Last Name    | *Suffix (eg, Jr, III) | Academic Degrees | Institution                                              | Location (city, state/province, country) | Role or Contribution, eg, chair, principal investigator | Group (if more than 1 Group listed in the byline) and/or Subgroup (eg, Steering Committee) |
|-----------------------------------|---------------|-----------------------|------------------|----------------------------------------------------------|------------------------------------------|---------------------------------------------------------|--------------------------------------------------------------------------------------------|
| Ronald                            | Brazg         |                       | MD               | Rainier Clinical Research Center, Inc.                   | Renton, WA, United States                | Principal Investigator                                  |                                                                                            |
| Martha                            | Gomez-Cuellar |                       | MD               | MGCENDO LLC                                              | San Juan, PR, United States              | Principal Investigator                                  |                                                                                            |
| Lisa                              | Connery       |                       | MD               | Alliance for Multispecialty Research, LLC                | Norman, OK, United States                | Principal Investigator                                  |                                                                                            |
| Joanna T                          | Van           |                       | DO               | University Clinical Investigators, Inc.                  | Tustin, CA, United States                | Principal Investigator                                  |                                                                                            |
| Jean-Louis                        | Selam         |                       | MD, PhD          | University Clinical Investigators, Inc.                  | Tustin, CA, United States                | Principal Investigator                                  |                                                                                            |
| John                              | Kim           |                       | DO               | University Clinical Investigators, Inc.                  | Tustin, CA, United States                | Principal Investigator                                  |                                                                                            |
| Dwight                            | Blake         |                       | MD               | SKY Clinical Research Network Group - Blake              | Union City, GA, United States            | Principal Investigator                                  |                                                                                            |
| John                              | Gabriel       |                       | MD               | North Hills Family Medicine/North Hills Medical Research | North Richland Hills, TX, United States  | Principal Investigator                                  |                                                                                            |
| Samir                             | Arora         |                       | MD               | Aventiv Research, Inc.                                   | Columbus, OH, United States              | Principal Investigator                                  |                                                                                            |
| Michael J                         | McCartney     |                       | MD               | ActivMed Practices and Research, LLC                     | Methuen, MA, United States               | Principal Investigator                                  |                                                                                            |
| Royce K                           | Solano        |                       | MD               | OptumCare Colorado Springs LLC                           | Colorado Springs, CO, United States      | Principal Investigator                                  |                                                                                            |
| Steven K                          | Brodie        |                       | MD               | OptumCare Colorado Springs LLC                           | Colorado Springs, CO, United States      | Principal Investigator                                  |                                                                                            |
| John P                            | Nardandrea    |                       | MD               | Renstar Medical Research                                 | Ocala, FL, United States                 | Principal Investigator                                  |                                                                                            |
