# Supplementary material
Source: PubMed Central journal article supplement (PMC10714284)
Supplement: jama-e2324945-s005.pdf [file jama-e2324945-s005.pdf]

## Data Sharing Statement

Aronne. Continued Treatment With Tirzepatide for Maintenance of Weight Reduction in Adults With Obesity. *JAMA*. Published December 11, 2023. doi:10.1001/jama.2023.24945

### Data

**Data available:** Yes

**Data types:** Deidentified participant data

**How to access data:** [www.vivli.org](http://www.vivli.org)

**When available:** beginning date: 12-31-2024

### Supporting Documents

**Document types:** None

### Additional Information

**Who can access the data:** Investigators whose proposed use of the data has been approved by an independent review committee (“learned intermediary”) identified for this purpose

**Types of analyses:** To achieve aims in the approved proposal

**Mechanisms of data availability:** Proposals should be submitted at [www.vivli.org](http://www.vivli.org) data requestors will need to sign a data sharing agreement. Data for each proposal are available in a controlled access environment.
